# Supplementary material for: Effects of selective heart rate reduction with ivabradine on left ventricular remodelling and function: results from the SHIFT echocardiography substudy
Source: Oxford University Press journal article supplement (doi:10.1093/eurheartj/ehr311), 2011-08-29
Supplement: ehr311_Supplementary_Data.zip [file ehr311_Supplementary_Data.zip]

Archive with 1 entries (1 files):
- ehr311supp.pdf
