# Supplementary material for: Effects of selective heart rate reduction with ivabradine on left ventricular remodelling and function: results from the SHIFT echocardiography substudy
Source: Oxford University Press journal article supplement (doi:10.1093/eurheartj/ehr311), 2011-08-29
Supplement: ehr311_Supplementary_Data.zip [file ehr311_Supplementary_Data.zip › ehr311supp.pdf]

*Effects of selective heart rate reduction with ivabradine on left ventricular remodelling and function: results from the SHIFT echocardiography substudy*  
TARDIF J-C., et al.

## Supplementary Data

|                                                   | Randomised patients not included in the echocardiography substudy |                     |              | Main study |
|---------------------------------------------------|-------------------------------------------------------------------|---------------------|--------------|------------|
|                                                   | Ivabradine<br>(n=2937)                                            | Placebo<br>(n=2957) | All (n=5894) | (N=6505)   |
| <b>BASELINE CHARACTERISTICS</b>                   |                                                                   |                     |              |            |
| Age (years)                                       | 60.76                                                             | 60.20               | 60.48        | 60.41      |
| Male                                              | 75.52%                                                            | 76.29%              | 75.91%       | 76.40%     |
| Current smoker                                    | 16.79%                                                            | 17.89%              | 17.34%       | 17.19%     |
| BMI (kg/m <sup>2</sup> )                          | 28.08                                                             | 27.98               | 28.03        | 27.99      |
| Creatinine clearance (mL/min/1.73m <sup>2</sup> ) | 74.66                                                             | 74.74               | 74.70        | 74.70      |
| Heart rate (bpm)                                  | 79.83                                                             | 80.22               | 80.02        | 79.89      |
| [70 ; 75[                                         | 35.76%                                                            | 34.94%              | 35.35%       | 36.04%     |
| [75 ; 80[                                         | 23.84%                                                            | 23.63%              | 23.74%       | 23.77%     |
| [80 ; 85[                                         | 16.18%                                                            | 15.67%              | 15.93%       | 15.64%     |
| ≥ 85 bpm                                          | 24.08%                                                            | 25.66%              | 24.87%       | 24.43%     |
| SBP (mmHg)                                        | 122.11                                                            | 121.62              | 121.86       | 121.67     |
| DBP (mmHg)                                        | 75.80                                                             | 75.62               | 75.71        | 75.66      |
| LVEF (%)                                          | 29.12                                                             | 29.03               | 29.08        | 29.00      |
| NYHA Class II                                     | 49.00%                                                            | 48.83%              | 48.91%       | 48.72%     |
| Class III                                         | 49.34%                                                            | 49.17%              | 49.25%       | 49.55%     |
| Class IV                                          | 1.63%                                                             | 1.96%               | 1.80%        | 1.71%      |
| <b>Medical history</b>                            |                                                                   |                     |              |            |
| Duration of CHF (years)                           | 3.52                                                              | 3.48                | 3.50         | 3.50       |
| Cause of CHF Ischaemic                            | 68.44%                                                            | 67.74%              | 68.09%       | 67.92%     |
| Non Ischaemic                                     | 31.56%                                                            | 32.26%              | 31.91%       | 32.08%     |
| Myocardial infarction                             | 56.15%                                                            | 56.10%              | 56.12%       | 56.36%     |
| Hypertension                                      | 67.52%                                                            | 66.86%              | 67.19%       | 66.32%     |
| Diabetes                                          | 29.86%                                                            | 30.71%              | 30.29%       | 30.42%     |
| Stroke                                            | 6.91%                                                             | 9.03%               | 7.97%        | 8.04%      |
| AF and/or flutter                                 | 8.34%                                                             | 8.08%               | 8.21%        | 8.02%      |
| CAD                                               | 72.93%                                                            | 73.08%              | 73.01%       | 72.74%     |
| Renal failure                                     | 6.67%                                                             | 6.09%               | 6.38%        | 6.46%      |
| At least one device                               | 3.40%                                                             | 4.09%               | 3.75%        | 3.75%      |
| <b>Treatment at randomisation</b>                 |                                                                   |                     |              |            |
| Beta-blockers                                     | 89.07%                                                            | 89.35%              | 89.21%       | 89.47%     |
| At least half target dose                         | 55.48%                                                            | 55.83%              | 55.66%       | 55.68%     |
| At target dose                                    | 26.02%                                                            | 25.41%              | 25.71%       | 26.05%     |
| ACE inhibitor                                     | 79.06%                                                            | 77.65%              | 78.35%       | 78.65%     |
| ARB                                               | 13.76%                                                            | 14.74%              | 14.25%       | 14.25%     |
| ACE inhibitor and/or ARB                          | 91.08%                                                            | 90.46%              | 90.77%       | 91.05%     |
| Diuretics                                         | 83.59%                                                            | 82.14%              | 82.86%       | 83.23%     |
| Antialdosterone                                   | 59.82%                                                            | 58.27%              | 59.04%       | 60.29%     |
| Digitalis                                         | 21.21%                                                            | 20.66%              | 20.94%       | 21.77%     |

ACE, angiotension-converting enzyme; AF, atrial fibrillation; ARB, angiotensin II receptor blocker; BMI, body mass index; bpm, beats per minute; CAD, coronary artery disease; CHF, congestive heart failure; DBP, diastolic blood pressure; LVEF, left ventricular ejection fraction; NYHA, New York Heart Association; SBP, systolic blood pressure.
